# Supplementary material for: Determination of two fluoroquinolones and their combinations with hyaluronan effect in in vitro canine cartilage explants
Source: PeerJ. 2019 Mar 12;7:e6553. doi: 10.7717/peerj.6553 (PMC6419719; doi:10.7717/peerj.6553)
Supplement: Supplemental Information 1 [file peerj-07-6553-s001.xlsx]

## Sheet: %sGAG
	Non -FQs	Non +HA	Non +Enro	Non +Mar	Non +HA +Enro	Non +HA +Ma	Pre -FQs	Pre +HA	Pre +Enro	Pre +Ma	Pre +HA +Enro	Pre +HA +Mar	with +Enro	with +Ma	with +Enro +HA	with +Ma +HA
T1	106.507	112.671	112.671	112.671	106.507	106.507	106.507	106.507	112.671	112.671	90.0685	106.507	90.7534	112.671	106.507	106.507
T1	90.0685	90.7534	90.7534	90.7534	90.0685	90.0685	90.0685	90.0685	90.7534	90.7534	106.507	90.0685	112.671	90.7534	90.0685	90.0685
T2	128.425	127.397	111.986	125.685	114.726	133.219	146.233	138.699	139.384	132.877	131.849	146.918	117.123	128.425	117.808	125.342
T2	130.479	126.712	113.014	132.534	118.151	130.137	144.863	139.726	138.014	135.959	130.137	142.123	119.521	129.11	122.26	127.055
T2	114.041	114.384					122.945	132.534
T2	110.616	118.836					122.945	135.616
T3	116.438	115.753	118.151	118.151	118.151	125.342	116.096	123.973	117.466	119.521	126.027	129.11	124.315	136.986	127.74	156.164
T3	115.411	115.411	119.521	114.041	122.945	127.397	119.178	125.685	115.411	117.123	121.918	130.137	132.192	132.534	128.082	141.781
T3	123.63	114.384					126.027	117.123
T3	126.37	119.178					125	114.384
T4	109.932	117.466	112.671	115.753	110.959	116.781	116.096	119.863	115.068	118.493	114.384	116.438	113.014	120.89	111.986	124.658
T4	113.356	113.699	114.384	116.781	110.616	119.863	116.781	131.507	117.808	117.466	115.411	118.493	117.123	122.945	113.014	124.658
T4	119.863	115.753					121.918	111.644
T4	122.945	123.288					122.26	111.644
T5	110.274	111.301	112.329	112.329	109.589	113.699	112.329	115.068	109.247	111.644	111.644	113.356	113.699	115.411	106.849	114.041
T5	110.959	106.849	109.247	111.986	109.589	107.534	108.904	111.986	111.644	111.301	111.986	112.329	109.932	111.644	109.589	111.986
T5	110.959	110.959					107.534	113.699
T5	108.219	110.274					109.589	106.507
	Enrofloxacin					Marbofloxacin
T4	Enro400	141.438	144.178	142.808	1.93728	Mar400	140.753	142.466	141.61	1.2108
T4	Enro1000	129.452	125.685	127.568	2.66376	Mar1000	130.822	129.795	130.308	0.72648
T5	Enro400	144.863	149.658	147.26	3.39024	Mar400	145.205	152.055	148.63	4.8432
T5	Enro1000	144.863	150	147.432	3.6324	Mar1000	144.863	140.411	142.637	3.14808

## Sheet: %Uronic acid
	T3						T5
	% Relative to negative control							% Relative to negative control
Group	rep1	rep2	rep3	rep4	rep5	rep6	rep1	rep2	rep3	rep4	rep5	rep6
Neg control	75.7953	123.513	100.692	75.7953	123.513	100.692	73.3073	87.9557	138.737	73.3073	87.9557	138.737
Neg control	100.489	112.952	86.5591	100.489	112.952	86.5591	91.0085	107.934	101.058	91.0085	107.934	101.058
Non +HA	124.225	165.217	105.486	124.225	165.217	105.486	79.5638	94.6029	95.6771	79.5638	94.6029	95.6771
Non +HA	74.8289	167.204	241.984	74.8289	167.204	241.984	184.941	232.395	147.851	184.941	232.395	147.851
Non +Enro	74.5764	113.677	88.0173	74.5764	113.677	88.0173	96.0342	136.942	201.305	96.0342	136.942	201.305
Non +Mar	77.377	110.17	85.5753	77.377	110.17	85.5753	53.7706	70.7791	66.3032	53.7706	70.7791	66.3032
Non +HA +Enro	150.121	144.299	213.516	150.121	144.299	213.516	186.366	162.78	166.554	186.366	162.78	166.554
Non +HA +Mar	121.097	181.609	215.715	121.097	181.609	215.715	82.5253	62.6206	91.0558	82.5253	62.6206	91.0558
Pre -FQs	90.3181	154.633	95.5048	90.3181	154.633	95.5048	81.0882	63.5937	140.017	81.0882	63.5937	140.017
Pre -FQs	56.8589	104.513	162.553	56.8589	104.513	162.553	68.8525	89.7975	89.7975	68.8525	89.7975	89.7975
Pre +HA	64.3845	106.916	112.102	64.3845	106.916	112.102	95.8203	151.066	104.107	95.8203	151.066	104.107
Pre +HA	44.6399	95.9596	223.037	44.6399	95.9596	223.037	83.3671	81.1149	137.982	83.3671	81.1149	137.982
Pre +Enro	62.3574	113.066	133.838	62.3574	113.066	133.838	106.697	151.787	134.332	106.697	151.787	134.332
Pre +Mar	50.7025	67.9006	58.3461	50.7025	67.9006	58.3461	88.4325	257.882	104.026	88.4325	257.882	104.026
Pre +HA +Enro	70.8394	180.123	127.887	70.8394	180.123	127.887	196.392	160.514	165.847	196.392	160.514	165.847
Pre +HA +Mar	96.1161	128.91	145.306	96.1161	128.91	145.306	116.648	172.57	102.43	116.648	172.57	102.43
With +Enro	103.902	147.89	102.68	103.902	147.89	102.68	71.735	129.758	107.115	71.735	129.758	107.115
With +Mar	126.016	169.13	136.227	126.016	169.13	136.227	122.867	132.448	103.706	122.867	132.448	103.706
With +HA +Enro	98.1216	142.704	199.77	98.1216	142.704	199.77	104.26	116.727	96.2805	104.26	116.727	96.2805
With +HA +Mar	174.15	156.462	112.707	174.15	156.462	112.707	134.831	86.0026	72.3307	134.831	86.0026	72.3307
Enro400	118.952	156.067	112.078	118.952	156.067	112.078	76.5245	87.305	85.765	76.5245	87.305	85.765
Enro1000	98.0729	112.526	74.822	98.0729	112.526	74.822	147.368	133.507	130.94	147.368	133.507	130.94
Mar400	129.159	224.969	199.756	129.159	224.969	199.756	190.024	178.151	276.527	190.024	178.151	276.527
Mar1000	272.926	190.41	248.722	272.926	190.41	248.722	236.388	206.847	259.663	236.388	206.847	259.663

## Sheet: %GAG content
T3	GAG content (relative to the control)	T5	GAG content (relative to the control)
Neg control	94.3359	Neg control	110.532
	97.6021		101.973
	94.9918		108.59
	95.8311		92.7102
	106.944		93.5481
	106.404		92.5882
	103.892		100.059
Non +HA	117.792	Non +HA	112.353
	103.849		107.604
	126.576		107.311
	94.3932		101.004
	87.6813		105.196
Non +Enro	109.813		105.446
	117.045	Non +Enro	132.453
Non +Mar	78.8758		121.131
	75.3598		109.927
	82.758		133.569
Non +HA +Enro	102.347	Non +Mar	98.9499
	97.111		99.7797
	99.1558	Non +HA +Enro	89.6626
Non +HA +Mar	119.132		90.6653
	123.806		87.5864
	119.213		91.1365
Pre -FQs	82.4891		98.9669
	85.2879	Non +HA +Mar	101.257
	81.338		95.7639
	82.2842	Pre -FQs	120.256
	83.954		124.326
	77.3156		123.508
	76.3469		113.352
	77.9849		116.422
Pre +HA	107.236		119.682
	105.869	Pre +HA	107.011
	101.988		111.737
	82.1055		112.292
	74.8564		116.813
	81.0377		114.895
Pre +Enro	101.711		104.7
	98.1384	Pre +Enro	140.984
	99.2918		147.317
Pre +Mar	91.1842		136.328
	93.1348		106.066
	86.5625	Pre +Mar	114.054
Pre +HA +Enro	115.418		108.489
	108.29	Pre +HA +Enro	119.885
	105.75		108.815
Pre +HA +Mar	101.874		120.989
	103.232	Pre +HA +Mar	118.7
	106.328		120.522
With +Enro	98.3673	With +Enro	122.88
	96.3993		119.437
	97.0915		120.903
With +Mar	78.9068		122.873
	78.3464	With +Mar	125.467
	83.357		115.439
	79.6708	With +HA +Enro	94.1602
With +HA +Enro	83.5651		98.148
	96.3312		98.0708
	97.1756		112.154
	86.011	With +HA +Mar	109.236
With +HA +Mar	88.6438		108.374
	94.7263	Enro400	107.692
			112.156
			126.214
		Enro1000	117.666
			108.767
			115.47
		Mar400	121.06
			123.777
			118.612
		Mar1000	113.04
			93.1262
			121.226

## Sheet: %Relative quantification
Relative quantification of gene expression (T3)													Relative quantification of gene expression (T5)
Group		TIMP1	NFKB1	TNF	IL-1b	PTGS1	PTGS2	MMP-3	MMP-9	ACAN	COL2A1	HAS1	Group		TIMP1	NFKB1	TNF	IL-1b	PTGS1	PTGS2	MMP-3	MMP-9	ACAN	COL2A1	HAS1
Neg control	1	1.03206	0.784343	1.05799	1.07375	1.08857	0.997979	0	1.3532	1.01923	0.974163	1.06854	Neg control	1	1.05919	0.914529	1.27153	1.01202	1.00995	1.05078	1	0.963235	1.05741	1.07395	0.960786
Neg control	1	0.968932	1.27495	0.945186	0.931316	0.918641	1.00202	1	0.73899	0.981137	1.02652	0.935852	Neg control	1	0.944119	1.09346	0.786454	0.988125	0.99015	0.95167	0	1.03817	0.945705	0.931139	1.04081
Neg control	1	1.1502	1.08163	1.05295	1.32122	1.1559	1.13091	1	1	1.15994	1.24767	1.36288	Neg control	1	1.01136	0.93282	1.10868	1.0761	1.00021	1.05858	0.991387	0.735341	1.13418	0.863571	1.10554
Neg control	1	0.869414	0.924534	0.949717	0.756875	0.865127	0.884247	0	0	0.862114	0.801493	0.733739	Neg control	1	0.988763	1.07202	0.901974	0.92928	0.999789	0.94466	1.00869	1.35991	0.881696	1.15798	0.904532
Non +HA	2	1.00671	5.37475	0.346176	1.21917	0.97671	0.713756	0.377427	3.12249	0.610775	0.760934	1.67263	Non +HA	2	0.258286	1.29638	2.0715	0.219488	0.468896	1.08305	2.32042	0.732091	0.865678	0.280129	1.70143
Non +HA	2	0.945735	1.81598	0.792329	0.970934	1.09722	1.01174	1.20965	1.16777	0.720779	1.06595	1.65651	Non +HA	2	0.336086	0.950187	4.00457	0.321469	0.448632	1.3303	2.41838	0.714925	1.05506	0.336915	1.52833
Non +HA	2	0.755809	0.524487	0.892965	2.05952	0.566688	0.961917	1.53085	0.835942	0.741329	0.862003	1.90664	Non +HA	2	0.157359	0.131247	2.38441	1.02567	1.36866	2.3257	1.66853	1.36475	0.080073	0.431676	3.54788
Non +HA	2	1.00443	0.697056	1.70116	2.07118	0.892867	1.22906	1.01628	1.29705	0.652471	1.22218	2.32844	Non +HA	2	0.149981	0.157315	2.53873	1.25477	1.62473	2.24477	1.08114	1.53746	0.102778	0.451084	3.02406
Non +Enro	3	0.00723004	0.143165	0.431343	0.36195	0.66517	0.208412	1.66262	0.838525	0.00754074	1.05287	0.580177	Non +Enro	3	0.320477	0.112153	1.85192	0.0609463	0.657138	1.32453	0	1.31999	0.13812	0.403642	1.38309
Non +Enro	3	0.00856554	0.142409	0.479718	0.402613	0.915375	0.256957	2.49125	0.90438	0.00728234	1.10751	0.660756	Non +Enro	3	0.291298	0.109804	1.97777	0	0.868076	1.65127	0.00979562	1.14902	0.173069	0.365002	0.885723
Non +Mar	4	1.18184	1.4276	0.440184	0.811856	0.605132	1.10869	1.8418	1.12685	1.00497	0.991668	1.76533	Non +Mar	4	2.24477	0.596261	3.57125	2.19134	2.48185	2.41297	0	0.477976	1.04334	1.72234	2.31779
Non +Mar	4	1.61228	1.72561	0.98671	0.768581	1.01583	1.16058	1.09109	3.08879	1.13976	1.36721	1.25361	Non +Mar	4	1.73446	0.53017	2.75168	2.01974	1.41509	2.25949	0	0.62721	0.737355	0.978658	2.4008
Non +HA +Enro	5	0.767565	1.53117	1.95603	1.61369	0.976964	1.79865	0.844185	1.06758	0.719935	0.825619	1.99906	Non +HA +Enro	5	0.278114	0.0405094	2.18136	0.804029	0.643161	2.45839	1.03488	1.72574	0.0699537	0.238182	2.07386
Non +HA +Enro	5	0.737006	1.57125	1.9023	1.41895	0.894911	1.22884	0	1.92712	0.550805	1.02172	2.41046	Non +HA +Enro	5	0.315642	0.0617547	2.28464	1.32942	1.4584	2.30342	1.55894	1.74455	0.0574945	0.313957	2.59928
Non +HA +Mar	6	2.21473	1.09762	1.50896	2.04467	2.89021	2.23311	0	7.998	5.23332	1.87259	6.33414	Non +HA +Mar	6	0.695252	0.537599	3.39768	0.394672	0.58255	2.0764	0	0.935153	1.23071	0.330173	1.02699
Non +HA +Mar	6	1.04048	0.743983	0.733328	0.512654	0.752141	0.811597	1.5548	0.53858	1.15803	0.447228	0.944947	Non +HA +Mar	6	1.44056	1.88459	4.90168	1.09888	1.85436	2.94007	6.78258	1.61374	2.18203	1.10946	6.92972
Pre -FQs	7	1.2413	0.8392	1.08567	1.40322	1.45826	0.729027	0	2.06997	0.75867	0.974486	3.57979	Pre -FQs	7	0.312172	0.159159	0.967305	0.606277	1.06907	1.05297	1.13442	1.094	0.253948	0.292903	1.60314
Pre -FQs	7	1.08911	1.78942	0.886709	2.89795	1.16509	0.786906	0	2.60443	0.338782	0.708284	1.63583	Pre -FQs	7	0.392056	0.190618	1.11388	0.78966	0.925938	1.21934	1.27427	1.2359	0.369099	0.335685	1.84514
Pre -FQs	7	0.880685	2.30208	0.68372	0.541736	1.22649	2.85678	0.304122	0.438877	1.52324	1.48561	0.713402	Pre -FQs	7	0.901625	3.44932	12.3419	1.98517	0.928426	8.23027	0	2.74905	2.71433	1.92811	8.11662
Pre -FQs	7	0.891297	2.83134	0.78289	0.905621	1.23676	2.1918	0.164108	0.293829	1.79923	1.53387	0.887306	Pre -FQs	7	0.498989	2.43252	10.4813	1.81154	1.10058	6.10525	34.9446	3.40817	1.76998	1.17546	7.1583
Pre +HA	8	0.51173	0.395197	0.347155	0.507137	0.481532	0.21871	0.416074	0.367262	0.181751	0.224344	0.737417	Pre +HA	8	0.790462	1.12861	2.54495	0.341485	0.707983	1.4546	10.9765	0.993932	1.27974	0.829677	1.67931
Pre +HA	8	0.32989	0.107464	0.145902	0.24383	0.137477	0.133221	0	0.0834638	0.109499	0.102037	0.162708	Pre +HA	8	0.906046	1.06437	5.29597	4.49093	1.17006	1.34238	0	1.41636	2.15811	1.64299	1.56504
Pre +HA	8	1.55677	1.96808	0.393698	0.745835	1.2286	1.48147	0.889871	0.410509	2.015	2.5338	0.470463	Pre +HA	8	0.11282	0.0604888	1.24515	0.488945	0.979815	1.07777	1.59947	0.813804	0.0344663	0.204909	2.09106
Pre +HA	8	1.99106	2.12719	0.527769	1.01955	1.30673	1.46813	1.06738	0	2.46172	3.10406	0.681656	Pre +HA	8	0.0979223	0.0598867	1.39535	0.502673	1.10383	1.24443	1.77591	0.879345	0.0424455	0.252642	1.81022
Pre +Enro	9	0.444235	2.63052	1.70059	1.21837	0.630584	6.17801	0.220944	1.19504	0.364788	1.77679	1.82621	Pre +Enro	9	0.0224281	0.00206897	1.48681	0.761556	0.881904	1.50768	0.651162	1.06617	0.00399372	0.0525384	2.19188
Pre +Enro	9	0.434389	2.50211	1.92664	1.11019	0.799925	5.5244	1.01005	0	0.361086	1.2085	1.42428	Pre +Enro	9	0.0189182	0.00367652	1.59754	0.450421	0.723731	1.33448	0.660082	1.16556	0.00597716	0.0823986	2.0185
Pre +Mar	10	0.580921	1.05839	0.545247	0.584211	0.640344	0.497206	0	0.646402	0.379676	0.314046	0.362367	Pre +Mar	10	0.879491	2.13369	5.33579	0.661341	1.04126	2.89531	9.97773	3.16121	2.8642	0.677922	3.07668
Pre +Mar	10	1.08479	2.51075	0.731729	1.00818	1.20894	0.670916	0	2.00743	0.679686	0.773148	0.929978	Pre +Mar	10	0.642331	2.43435	4.72832	0.663543	0.743449	3.52209	6.68969	2.52896	2.43879	0.828432	3.10679
Pre +HA +Enro	11	0.785279	2.3462	2.84736	4.35577	1.42671	8.06447	0	0	0.551507	1.69641	3.2858	Pre +HA +Enro	11	0.0392268	0.00767619	0.62061	0.118315	0.554567	0.569018	2.81074	0.510554	0.00315105	0.0518907	0.583482
Pre +HA +Enro	11	0.438929	2.04152	2.04575	2.33037	0.733605	4.35576	0.862927	0.740351	0.429476	1.2725	2.1666	Pre +HA +Enro	11	0.0477763	0.0186636	0.531966	0.326965	0.701812	0.943501	2.46386	0.650323	0.00623543	0.0590283	0.8931
Pre +HA +Mar	12	0.377564	0.511733	0.336695	0.298359	0.286885	0.378044	0.37779	0.267014	0.532726	0.321859	0.491582	Pre +HA +Mar	12	0.660106	0.434501	1.22582	0.231945	0.593857	0.66148	0	0.53681	2.28114	0.552938	0.883374
Pre +HA +Mar	12	0.371923	0.646366	0.304448	0.276901	0.291166	0.242892	0.186572	0.262037	0.495724	0.338873	0.259711	Pre +HA +Mar	12	0.619956	1.30764	2.00834	0.239406	0.39906	0.539929	0.843605	0.364583	2.80516	0.914156	0.918489
With +Enro	13	0.145734	1.37518	1.20405	0.796003	1.00266	3.06356	2.09814	0.395656	0.224214	0.959404	2.53002	With +Enro	13	0.663894	0.0639932	0.692905	0.615657	0.632631	1.26921	0.415042	0.86245	0.106086	0.186068	1.73801
With +Enro	13	0.120053	0.800293	0.859938	0.71459	0.704182	2.01651	2.66468	0.555097	0.197907	0.730868	1.10928	With +Enro	13	0.784469	0.0711412	0.991832	0.643784	0.822282	1.17932	1.24116	1.42972	0.192669	0.181187	1.59801
With +Mar	14	1.61103	1.24577	2.17397	2.02081	2.12939	1.6347	0	4.9695	1.21561	1.21443	5.87032	With +Mar	14	3.3193	2.22465	6.6531	1.15691	1.04372	2.7198	46.8393	1.36019	3.53994	1.07426	3.27323
With +Mar	14	0.33612	0.113881	0.850489	0.766868	0.483707	0.343158	0.311824	1.01189	0.329421	0.232734	1.71994	With +Mar	14	1.20387	0.847208	3.5466	0.390607	0.435312	0.901962	7.50973	0.554973	1.52054	0.319687	1.02843
With +HA +Enro	15	1.14832	9.5806	0.306201	1.67617	1.49166	10.7089	0.551977	0.696926	2.03589	2.12414	0.797635	With +HA +Enro	15	0.392542	0.14055	0.906326	0.468089	0.696166	1.34017	1.28076	0.694953	0.0805455	0.315172	1.12233
With +HA +Enro	15	1.10154	8.26343	0.328641	1.56474	1.20135	9.79481	0.592544	0.254429	1.6651	2.16613	0.330242	With +HA +Enro	15	0.358642	0.074139	0.728985	0.436617	0.896468	1.18265	1.40739	0.93468	0.0579645	0.325821	1.38225
With +HA +Mar	16	0.970996	1.13034	1.85466	1.25299	1.37642	1.12328	2.17493	0.900494	0.777876	0.8414	2.35686	With +HA +Mar	16	1.16972	0.611575	1.75878	0.276998	0.295313	0	3.25599	0.693508	4.35955	0.419118	0.911134
With +HA +Mar	16	0.852498	0.644866	1.61964	1.02807	0.66587	0.714871	0.252351	1.74473	0.830651	0.383567	1.70473	With +HA +Mar	16	1.39163	0.583005	1.3084	0.213184	0.15176	0	3.27733	1.53334	2.67377	0.300527	0.870719
													E400T5	17	1.05086	0.558436	1.4385	0.388219	1.09239	1.15398	2.95476	1.22858	0.113638	0.0881866	4.56779
													E400T5	17	0.879509	0.668745	2.04582	3.11868	1.91301	0.70746	0.68229	1.85268	0.111681	0.19199	3.16927
													M400T5	18	0.434133	5.21153	5.80085	1.15756	1.97647	1.8788	54.0799	2.05852	0.0001702	0.33661	3.5702
													M400T5	18	0.168141	1.67904	2.29681	0.617158	0.913253	0.491064	11.4811	0.652717	0.350264	0.0112792	0.253997
													E1000T5	19	0.506384	0.206651	1.21687	0.260227	1.27624	1.02439	0.272158	1.2827	0.0307751	0.0155504	1.61026
													E1000T5	19	0.414973	0.181943	0.859142	0.237871	0.793114	0.902424	0.796282	1.23281	0.0166738	0.0470049	2.10379
													M1000T5	20	0.0148349	0.128562	2.95779	0.247932	0.431897	0.366188	0	0.659695	0.0166345	0.162469	0.607728
													M1000T5	20	0.138087	0.195525	8.38734	0.874553	2.14112	1.96523	37.0675	3.85883	0.0213916	0.426179	4.24593
													IL T5	21	0.461334	0.940654	0.123735	0.209823	2.06917	0.137136	0.816577	0.185298	4.29032	1.1131	0.360492
													IL T5	21	0.441244	0.742988	0.106808	0.125647	1.90568	0.0755959	0.226701	0.159264	4.31738	0.78372	0.207978
